# Supplementary material for: Heritability and prevalence of selected osteochondrosis lesions in yearling Thoroughbred horses
Source: PubMed Central journal article supplement (PMC5412687; doi:10.1111/evj.12613), 2016-09-04
Supplement: EVJ-49-282-s001.pdf [file EVJ-49-282-s001.pdf]

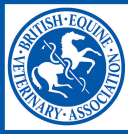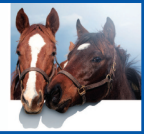

**Supplementary Item 1:** Complete list of 34 radiographic views. Each view is repeated for left and right limbs.

|                      |                                                                                                                                                                                                                                             |
|----------------------|---------------------------------------------------------------------------------------------------------------------------------------------------------------------------------------------------------------------------------------------|
| <b>Fore feet</b>     | Lateromedial (LM)                                                                                                                                                                                                                           |
| <b>Fore fetlocks</b> | Flexed lateromedial (flexed LM)<br>Dorso 45-55 degree lateral-palmaromedial elevated 5-10 degree oblique (DLPaMO)<br>Dorso 45-55 degree medial-palmarolateral elevated 5-10 degree oblique (DMPaLO)<br>Dorsopalmar elevated 20 degree (DPa) |
| <b>Carpi</b>         | Flexed lateromedial (Flexed LM)<br>Dorso 50-60 degree lateral-palmaromedial oblique (DLPMO)<br>Dorso 70 degree medial-palmarolateral oblique (DMPLO)                                                                                        |
| <b>Hind fetlocks</b> | Lateromedial (LM)<br>Dorso 45-55 degree lateral-palmaromedial 15-20 degree elevated oblique (DLPIMO)<br>Dorso 45-55 degree medial-palmarolateral 15-20 degree elevated oblique (DMPILO)<br>Dorsopalmar 30 degree elevated (DPI)             |
| <b>Tarsi</b>         | Lateromedial (LM)<br>Dorso 50-60 degree medial plantarolateral oblique (DMPILO)<br>Dorso 10-20 degree lateral palmaro medial oblique (DPI)                                                                                                  |
| <b>Stifles</b>       | Lateromedial (LM)<br>Caudocranial (CdCr)                                                                                                                                                                                                    |
