# Supplementary material for: Heritability and prevalence of selected osteochondrosis lesions in yearling Thoroughbred horses
Source: PubMed Central journal article supplement (PMC5412687; doi:10.1111/evj.12613), 2016-09-04
Supplement: EVJ-49-282-s002.pdf [file EVJ-49-282-s002.pdf]

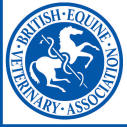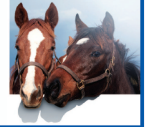

## Supplementary Item 2: Summary statistics on pedigree data structure

| Description    | Number of animals |
|----------------|-------------------|
| Total Pedigree | 5,249             |
| Sires          | 677               |
| Sires of Sire  | 111               |
| Dams of Sire   | 231               |
| Dams           | 2,726             |
| Sires of Dam   | 487               |
| Dams of Dam    | 1,239             |
