# Supplementary material for: Heritability and prevalence of selected osteochondrosis lesions in yearling Thoroughbred horses
Source: PubMed Central journal article supplement (PMC5412687; doi:10.1111/evj.12613), 2016-09-04
Supplement: EVJ-49-282-s003.pdf [file EVJ-49-282-s003.pdf]

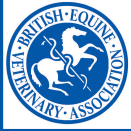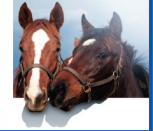

### Supplementary Item 3: Summary of estimates of variance and heritability obtained from an animal model for some osteochondrosis lesions.

| Trait (osteochondrosis lesion site)     | $s^2_{Anim}$ | $s^2_{PE}$ | $s^2_{Phen}$ | SE    | $h^2$ | SE   | $h^2_{Underlyin_g}$ | PE          | SE   |
|-----------------------------------------|--------------|------------|--------------|-------|-------|------|---------------------|-------------|------|
| Any osteochondrosis                     | 0.012        | 0.024      | 0.203        | 0.007 | 0.07  | 0.04 | <b>0.13</b>         | <b>0.09</b> | 0.04 |
| Stifle cyst                             | 0.000        | 0.000      | 0.036        | 0.001 | 0.00  | 0.00 | 0.00                | 0.01        | 0.04 |
| Lateral trochlear ridge of distal femur | 0.004        | 0.008      | 0.058        | 0.002 | 0.06  | 0.04 | <b>0.24</b>         | <b>0.13</b> | 0.05 |
| Any stifle osteochondrosis              | 0.005        | 0.010      | 0.089        | 0.003 | 0.06  | 0.04 | <b>0.17</b>         | <b>0.11</b> | 0.04 |
| Distal intermediate ridge of the tibia  | 0.001        | 0.000      | 0.035        | 0.001 | 0.02  | 0.03 | <b>0.12</b>         | 0.00        | 0.03 |
| Lateral trochlear ridge of talus        | 0.000        | 0.001      | 0.023        | 0.001 | 0.01  | 0.04 | 0.03                | 0.04        | 0.04 |
| Any tarsal osteochondrosis              | 0.001        | 0.001      | 0.057        | 0.002 | 0.01  | 0.03 | 0.03                | 0.02        | 0.03 |
| Dorso-proximal P1 lesion                | 0.000        | 0.000      | 0.036        | 0.001 | 0.00  | 0.02 | 0.02                | 0.00        | 0.04 |
| Proximal sagittal ridge of MC/MT3       | 0.000        | 0.000      | 0.038        | 0.005 | 0.01  | 0.01 | <b>0.06</b>         | 0.00        | 0.00 |
| Any fetlock osteochondrosis             | 0.000        | 0.000      | 0.074        | 0.003 | 0.01  | 0.03 | 0.02                | 0.00        | 0.04 |

Key:  $s^2_{Anim}$  = variation attributable to the animal;  $s^2_{PE}$  = variation attributable to permanent environment due to the dam;  $s^2_{Phen}$  = variation attributable to the phenotype; SE = standard error of the column to the left;  $h^2$  = heritability estimate;  $h^2_{underlying}$  = underlying heritability estimate; PE = proportion of variation attributable to the permanent environment due to the dam. Significant estimates in bold italics.
