# Supplementary material for: Heritability and prevalence of selected osteochondrosis lesions in yearling Thoroughbred horses
Source: PubMed Central journal article supplement (PMC5412687; doi:10.1111/evj.12613), 2016-09-04
Supplement: EVJ-49-282-s004.pdf [file EVJ-49-282-s004.pdf]

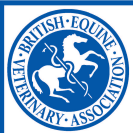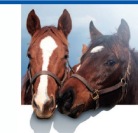

**Supplementary Item 4:** Summary of estimates of variance and heritability obtained from a sire model for some osteochondrosis lesions.

| Trait (osteochondrosis lesion site)     | $s^2_{\text{Sire}}$ | $s^2_{\text{Phen}}$ | SE    | $h^2$ | SE   | $h^2_{\text{Underlying}}$ | PE          | SE   |
|-----------------------------------------|---------------------|---------------------|-------|-------|------|---------------------------|-------------|------|
| Any osteochondrosis                     | 0.002               | 0.178               | 0.006 | 0.05  | 0.04 | <b>0.11</b>               | <b>0.11</b> | 0.04 |
| Stifle cyst                             | 0.000               | 0.036               | 0.001 | 0.00  | 0.00 | 0.00                      | 0.01        | 0.04 |
| Lateral trochlear ridge of distal femur | 0.001               | 0.058               | 0.002 | 0.05  | 0.04 | 0.28                      | <b>0.15</b> | 0.04 |
| Any stifle osteochondrosis              | 0.001               | 0.089               | 0.003 | 0.06  | 0.04 | <b>0.23</b>               | <b>0.13</b> | 0.04 |
| Distal intermediate ridge of the tibia  | 0.000               | 0.035               | 0.001 | 0.01  | 0.03 | <b>0.08</b>               | 0.01        | 0.03 |
| Lateral trochlear ridge of talus        | 0.000               | 0.023               | 0.001 | 0.00  | 0.00 | 0.00                      | 0.05        | 0.03 |
| Any tarsal osteochondrosis              | 0.000               | 0.057               | 0.002 | 0.00  | 0.00 | 0.00                      | 0.02        | 0.03 |
| Dorso-proximal P1                       | 0.000               | 0.036               | 0.001 | 0.02  | 0.03 | <b>0.09</b>               | 0.00        | 0.04 |
| Proximal sagittal ridge of MC/MT3       | 0.000               | 0.038               | 0.005 | 0.01  | 0.01 | <b>0.04</b>               | 0.00        | 0.00 |
| Any fetlock osteochondrosis             | 0.000               | 0.074               | 0.003 | 0.00  | 0.02 | 0.01                      | 0.00        | 0.04 |

Key:  $s^2_{\text{Sire}}$  = variation attributable to the sire;  $s^2_{\text{Phen}}$  = variation attributable to the phenotype; SE = standard error of the column to the left;  $h^2$  = heritability estimate;  $h^2_{\text{underlying}}$  = underlying heritability estimate; PE = proportion of variation attributable to the permanent environment due to the dam. Significant estimates in bold italics.
