# Supplementary material for: Heritability and prevalence of selected osteochondrosis lesions in yearling Thoroughbred horses
Source: PubMed Central journal article supplement (PMC5412687; doi:10.1111/evj.12613), 2016-09-04
Supplement: EVJ-49-282-s005.pdf [file EVJ-49-282-s005.pdf]

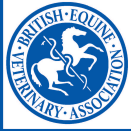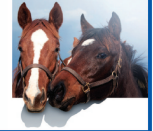

**Supplementary Item 5:** Summary of estimates of variance and heritability obtained from an animal model using the logit function for some osteochondrosis lesions.

| Trait (osteochondrosis lesion site)     | $s^2_{Anim}$ | $s^2_{PE}$ | $s^2_{Phen}$ | SE    | $h^2$ | SE   | PE   | SE   |
|-----------------------------------------|--------------|------------|--------------|-------|-------|------|------|------|
| Any osteochondrosis                     | 0.210        | 0.173      | 3.681        | 0.165 | 0.06  | 0.04 | 0.05 | 0.05 |
| Stifle cyst                             | 0.000        | 0.168      | 3.468        | 0.656 | 0.00  | 0.00 | 0.05 | 0.18 |
| Lateral trochlear ridge of distal femur | 0.413        | 0.339      | 4.109        | 0.403 | 0.10  | 0.11 | 0.08 | 0.12 |
| Any stifle osteochondrosis              | 0.321        | 0.287      | 3.908        | 0.288 | 0.08  | 0.08 | 0.07 | 0.08 |
| Distal intermediate ridge of the tibia  | 0.418        | 0.000      | 3.718        | 0.513 | 0.11  | 0.11 | 0.00 | 0.00 |
| Lateral trochlear ridge of talus        | 0.000        | 0.737      | 4.037        | 0.758 | 0.00  | 0.00 | 0.18 | 0.15 |
| Any tarsal osteochondrosis              | 0.090        | 0.170      | 3.561        | 0.414 | 0.03  | 0.10 | 0.05 | 0.13 |
| Dorso-proximal P1                       | 0.103        | 0.015      | 3.520        | 0.681 | 0.03  | 0.18 | 0.00 | 0.22 |
| Proximal sagittal ridge of MC/MT3       | 0.497        | 0.135      | 3.930        | 0.950 | 0.13  | 0.23 | 0.03 | 0.28 |
| Any fetlock osteochondrosis             | 0.078        | 0.000      | 3.430        | 0.283 | 0.02  | 0.08 | 0.00 | 0.00 |

Key:  $s^2_{Anim}$  = variation attributable to the animal;  $s^2_{PE}$  = variation attributable to permanent environment due to the dam;  $s^2_{Phen}$  = variation attributable to the phenotype; SE = standard error of the column to the left;  $h^2$  = heritability estimate; PE = proportion of variation attributable to the permanent environment due to the dam. Significant estimates in bold italics.
